# Supplementary material
Source: publisher figshare collection journal article supplement (https://sage.figshare.com/ndownloader/files/17961587)
Supplement: Supplementary file 1 [file 17961587]

## Supplemental Material

**Table S1.** Demographic, social and economic characteristics of the ICU staff.

| Variable                         | Multibed design (n=86) | Single-bed design (n=70) | p    |
|----------------------------------|------------------------|--------------------------|------|
| Profession (%)                   |                        |                          | 0.20 |
| Physician                        | 10 (11.6)              | 3 (4.3)                  |      |
| Nurse                            | 69 (80.3)              | 63 (90)                  |      |
| Respiratory therapist            | 7 (8.1)                | 4 (5.7)                  |      |
| Age (years)                      | 35 (30-39)             | 33 (29-39)               | 0.58 |
| Male (n=152)                     | 28 (33.3)              | 18 (26.5)                | 0.38 |
| Working years in ICU             | 7 (4-11)               | 5 (3-9)                  | 0.21 |
| Marital status (%)               |                        |                          | 0.62 |
| Single                           | 27 (31.4)              | 24 (34.3)                |      |
| Married                          | 49 (57)                | 39 (55.7)                |      |
| Divorced                         | 8 (9.3)                | 7 (10)                   |      |
| Widowed                          | 2 (2.3)                | 0 (0)                    |      |
| Offspring (n=155)                |                        |                          | 0.10 |
| 0                                | 46 (53.5)              | 34 (49.3)                |      |
| 1                                | 13 (15.1)              | 18 (26.1)                |      |
| 2                                | 16 (18.6)              | 10 (14.5)                |      |
| 3                                | 10 (11.6)              | 3 (4.3)                  |      |
| ≥ 4                              | 1 (1.2)                | 4 (6.8)                  |      |
| Religion (n=155)                 |                        |                          | 0.17 |
| Catholic                         | 32 (37.2)              | 30 (43.5)                |      |
| Protestant                       | 22 (25.6)              | 15 (21.5)                |      |
| Jewish                           | 1 (1.2)                | 0 (0)                    |      |
| Spiritualist                     | 15 (21.7)              | 12 (14.0)                |      |
| Atheist                          | 0 (0)                  | 6 (7.0)                  |      |
| Others                           | 9 (13.0)               | 13 (15.1)                |      |
| Shift                            |                        |                          | 0.51 |
| Morning                          | 20 (23.3)              | 22 (31.4)                |      |
| Afternoon                        | 30 (34.9)              | 21 (30)                  |      |
| Overnight                        | 36 (41.9)              | 27 (38.6)                |      |
| Weekly hours worked              | 36 (36-40)             | 36 (36-40)               | 0.60 |
| Work in other hospital (%)       | 21 (24.4)              | 13 (18.6)                | 0.43 |
| Psychiatric treatment (%)        |                        |                          | 0.61 |
| Never                            | 75 (87.2)              | 58 (82.9)                |      |
| Current                          | 6 (7)                  | 5 (7.1)                  |      |
| Previous                         | 5 (5.8)                | 7 (10)                   |      |
| Smoking                          | 9 (10.4)               | 2 (2.9)                  | 0.16 |
| Alcohol use (n=155)              |                        |                          | 0.38 |
| No                               | 37 (43)                | 27 (39.1)                |      |
| 1-2 times/month                  | 23 (26.7)              | 27 (39.1)                |      |
| 1 time/week                      | 20 (23.3)              | 11 (15.9)                |      |
| ≥ 2 times/week                   | 6 (7)                  | 4 (5.8)                  |      |
| Illicit substances use (n=150)   | 2 (2.4)                | 2 (2.9)                  | 1.0  |
| Hobby                            | 45 (52.3)              | 33 (47.1)                | 0.62 |
| Weekly physical activity         | 35 (40.7)              | 29 (41.4)                | 1.0  |
| Monthly absenteeism              |                        |                          | 0.60 |
| 0                                | 69 (80.2)              | 56 (80.2)                |      |
| 1-3                              | 11 (12.8)              | 11 (15.7)                |      |
| 3-5                              | 1 (1.2)                | 1 (1.4)                  |      |
| 5-10                             | 3 (3.5)                | 0 (0)                    |      |
| >10                              | 2 (2.3)                | 2 (2.9)                  |      |
| Intend to leave work (n=155)     | 20 (23.3)              | 16 (22.9)                | 0.66 |
| Conflict in ICU at the last week |                        |                          | 0.35 |

|                                |           |           |      |
|--------------------------------|-----------|-----------|------|
| No                             | 72 (83.7) | 57 (81.4) |      |
| Yes, with ICU staff            | 7 (8.1)   | 9 (12.9)  |      |
| Yes, with patients or visitors | 5 (5.8)   | 1 (1.4)   |      |
| Yes, with staff and patients   | 2 (2.3)   | 3 (4.3)   |      |
| Monthly income in reais        |           |           | 0.20 |
| 1000-3000                      | 22 (25.6) | 22 (31.4) |      |
| 3000-5000                      | 31 (36.1) | 32 (45.7) |      |
| 5000-8000                      | 23 (26.7) | 11 (15.7) |      |
| >8000                          | 10 (11.6) | 5 (7.2)   |      |

Note. ICU = intensive care unit. Six staff members did not answer the question about the use of illicit drugs, four did not answer the question about gender, one about the offspring, religion, use of alcohol and intention to leave the work at the hospital. In January 2019, the current exchange rate was 1.0 US dollar to 3.7 Brazilian reais.

**Table S2.** Physical and psychological stress symptoms that family visitors and ICU staff have experienced in the last 24 hours.

| Symptoms                            | Family visitors           |                            | ICU Staff                 |                            |
|-------------------------------------|---------------------------|----------------------------|---------------------------|----------------------------|
|                                     | Multi-bed design (n = 95) | Single-bed design (n = 81) | Multi-bed design (n = 86) | Single-bed design (n = 70) |
| Cold hands or feet                  | 15 (15.8)                 | 9 (11.1)                   | 7 (8.1)                   | 10 (14.3)                  |
| Dry mouth                           | 22 (23.2)                 | 14 (17.3)                  | 10 (11.6)                 | 24 (34.3)                  |
| Knot in the stomach                 | 25 (26.3)                 | 21 (25.9)                  | 15 (17.4)                 | 19 (27.1)                  |
| Increased sweating                  | 8 (8.4)                   | 3 (3.7)                    | 10 (11.6)                 | 4 (5.7)                    |
| Muscle tension                      | 31 (32.6)                 | 33 (40.7)                  | 51 (59.3)                 | 50 (71.4)                  |
| Jaw clenching                       | 19 (20.0)                 | 13 (16.0)                  | 20 (23.3)                 | 17 (24.3)                  |
| Transient diarrhea                  | 11 (11.6)                 | 9 (11.1)                   | 5 (5.8)                   | 6 (8.6)                    |
| Insomnia                            | 25 (26.3)                 | 24 (29.6)                  | 19 (22.1)                 | 26 (37.1)                  |
| Tachycardia                         | 10 (10.5)                 | 7 (8.6)                    | 12 (14.0)                 | 18 (25.7)                  |
| Hyperventilation                    | 2 (2.1)                   | 4 (4.9)                    | 2 (2.1)                   | 2 (2.9)                    |
| Sudden and transient hypertension   | 4 (4.2)                   | 6 (7.4)                    | 2 (2.1)                   | 3 (4.3)                    |
| Appetite change                     | 31 (32.6)                 | 27 (33.3)                  | 19 (22.1)                 | 29 (41.4)                  |
| Surge of motivation                 | 1 (1.1)                   | 6 (7.4)                    | 15 (17.4)                 | 13 (18.6)                  |
| Sudden enthusiasm                   | 3 (3.2)                   | 2 (2.5)                    | 11 (12.8)                 | 9 (12.9)                   |
| Sudden desire to start new projects | 5 (5.3)                   | 3 (3.7)                    | 23 (26.7)                 | 26 (37.1)                  |

**Note:** Fifteen questions derived from Lipp's stress symptoms inventory for adults.

**Table S3.** Demographic, social and economic characteristics of family visitors.

| Variable                                        | Multibed design<br>(n=95) | Single-bed design<br>(n=81) | P    |
|-------------------------------------------------|---------------------------|-----------------------------|------|
| Kinship (%)                                     |                           |                             | 0.50 |
| Spouse                                          | 50 (52.6)                 | 39 (48.1)                   |      |
| Parent                                          | 13 (13.7)                 | 7 (8.6)                     |      |
| Offspring                                       | 25 (26.3)                 | 26 (32.1)                   |      |
| Sibling                                         | 7 (7.4)                   | 9 (11.1)                    |      |
| Age (years)                                     | 54 (42-62)                | 49 (42-59)                  | 0.23 |
| Male (n=152)                                    | 25 (26.3)                 | 27 (33.3)                   | 0.32 |
| Marital status (%)                              |                           |                             | 0.34 |
| Single                                          | 11 (11.6)                 | 14 (17.7)                   |      |
| Married                                         | 73 (76.8)                 | 59 (74.7)                   |      |
| Divorced                                        | 10 (10.5)                 | 4 (5.1)                     |      |
| Widowed                                         | 1 (1.1)                   | 2 (2.5)                     |      |
| Religion (%) (n=173)                            |                           |                             | 0.56 |
| Catholic                                        | 56 (60.2)                 | 49 (61.3)                   |      |
| Protestant                                      | 8 (8.6)                   | 10 (12.5)                   |      |
| Spiritualist                                    | 17 (18.3)                 | 16 (20.0)                   |      |
| Atheist                                         | 3 (3.2)                   | 2 (2.5)                     |      |
| Others                                          | 9 (9.7)                   | 3 (3.8)                     |      |
| Previous diagnosis of anxiety or depression (%) | 18 (18.9)                 | 18 (22.2)                   | 0.70 |
| Lived with the patient (%) (n=173)              | 62 (67.4)                 | 56 (69.1)                   | 0.87 |
| Previous knowledge of ICU (%)                   | 73 (76.8)                 | 62 (76.5)                   | 1.00 |
| Employment (%)                                  |                           |                             | 0.12 |
| Working at the moment                           | 46 (50.1)                 | 50 (64.9)                   |      |
| Retired                                         | 34 (37.4)                 | 18 (23.4)                   |      |
| Unemployed                                      | 11 (12.1)                 | 9 (11.7)                    |      |
| Education (%)                                   |                           |                             | 0.13 |
| Elementary                                      | 11 (11.6)                 | 6 (7.6)                     |      |
| High school                                     | 28 (29.5)                 | 15 (19.0)                   |      |
| College or higher                               | 56 (58.9)                 | 58 (73.4)                   |      |
| Monthly income in reais (%) (n=167)             |                           |                             | 0.15 |
| < 1000                                          | 4 (4.4)                   | 0 (0)                       |      |
| 1000-3000                                       | 21 (23.0)                 | 12 (15.8)                   |      |
| 3000-5000                                       | 22 (24.2)                 | 21 (27.6)                   |      |
| 5000-8000                                       | 13 (14.3)                 | 8 (10.5)                    |      |
| > 8000                                          | 31 (34.1)                 | 35 (46.1)                   |      |

Note. Twenty-four family visitors did not answer the questions about gender, nine about living with the patient, three about the monthly income and religion.

**Table S4.** Patients' characteristics at admission and during ICU stay.

| Variable                       | Admitted in multibed rooms<br>(n=95) | Admitted in single-bed<br>rooms (n=81) | p    |
|--------------------------------|--------------------------------------|----------------------------------------|------|
| Age in years                   | 65 (53-74)                           | 62 (51-70)                             | 0.22 |
| Male (%)                       | 57 (60%)                             | 41 (51%)                               | 0.13 |
| SAPS3 at admission             | 61 (47-70)                           | 63 (51-73)                             | 0.18 |
| ECOG                           |                                      |                                        | 0.43 |
| 0 - 1                          | 59 (62.1)                            | 61 (75.3)                              |      |
| 2 - 4                          | 36 (37.9)                            | 20 (24.7)                              |      |
| Type of admission              |                                      |                                        | 0.26 |
| Medical (%)                    | 51 (53.7%)                           | 53 (65.4%)                             |      |
| Elective postoperative (%)     | 39 (41%)                             | 24 (29.6%)                             |      |
| Emergency postoperative (%)    | 5 (5.3%)                             | 4 (5%)                                 |      |
| Previous location              |                                      |                                        | 0.20 |
| Surgery room (%)               | 61 (15.0)                            | 12 (12.0)                              |      |
| Ward (%)                       | 248 (61.0)                           | 49(49.0)                               |      |
| Emergency room (%)             | 98 (24.0)                            | 39 (39.0)                              |      |
| Type of cancer                 |                                      |                                        | 0.07 |
| Solid tumor (%)                | 88 (92.6%)                           | 66 (81.5%)                             |      |
| Hematological malignancies (%) | 5 (5.2%)                             | 13 (16%)                               |      |
| Without cancer                 | 2 (2.2%)                             | 1 (2.5%)                               |      |
| Metastatic solid tumor         | 48 (54.5%)                           | 32 (78.5%)                             | 0.14 |
| Reasons of ICU admissions      |                                      |                                        | 0.63 |
| Postoperative monitoring       | 39 (41.1%)                           | 25 (31%)                               |      |
| Sepsis or septic shock (%)     | 21 (22.1)                            | 15 (18.5)                              |      |
| Respiratory distress (%)       | 14 (14.7%)                           | 17 (21%)                               |      |
| Neurologic abnormalities (%)   | 9 (9.5)                              | 9 (11.1)                               |      |
| Cardiac abnormalities (%)      | 2 (2.1)                              | 1(1.2)                                 |      |
| Hemorrhagic shock (%)          | 2 (2.1%)                             | 5 (6.2%)                               |      |
| Others (%)                     | 8 (8.4)                              | 9 (11.1)                               |      |
| During ICU stay                |                                      |                                        |      |
| Mechanical ventilation (%)     | 23 (24.2%)                           | 19 (23.4%)                             | 0.99 |
| Hemodialysis (%)               | 7 (7.3%))                            | 7 (8.6%)                               | 0.68 |
| ICU length of stay (days)      | 3 (2-6)                              | 3 (1-5)                                | 0.99 |
| ICU outcome                    |                                      |                                        | 0.86 |
| Discharged to ward             | 82 (86.3)                            | 68 (80.0)                              |      |
| Death (%)                      | 08 (8.4)                             | 12 (14.8)                              |      |
| Transferred for other hospital | 5 (5.2%)                             | 1 (1.2%)                               |      |

Notes. ICU = intensive care unit; SAPS 3 = simplified acute physiology score; ECOG = Eastern Cooperative Oncology Group performance status. Categorical and continuous data are presented as percentages and median (25%-75% interquartile range [IQR]). respectively.
